# Supplementary material for: Effective method for removal of polymeric template from SBA-16 silica combining extraction and temperature-controlled calcination
Source: Royal Society of Chemistry journal article supplement (doi:10.1039/b515975j), 2005-12-19
Supplement: b515975j.pdf [file b515975j.pdf]

## Effective method for removal of polymeric template from SBA-16 silica combining extraction and temperature-controlled calcination

Rafal M. Grudzien, Bogna E. Grabicka and Mietek Jaroniec\*

<sup>a</sup> Department of Chemistry, Kent state University, Kent, OH 44242, USA. Fax: +1 330 672 3816;

Tel: +1 330 672 3790; E-mail: [jaroniec@kent.edu](mailto:jaroniec@kent.edu)

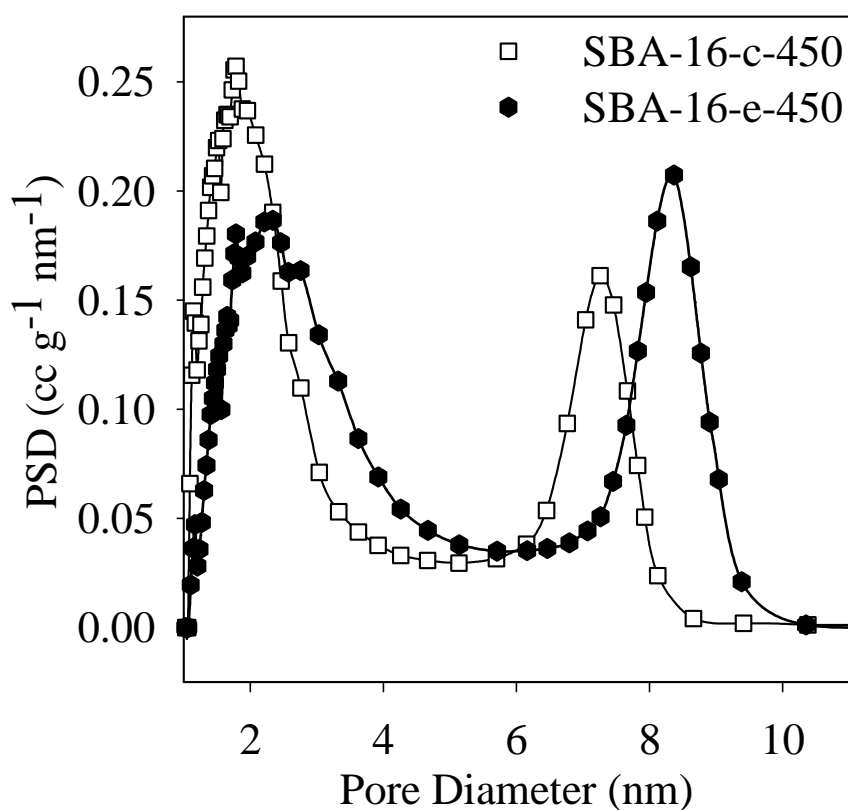

**Figure 1S.**

Comparison of pore size distributions (PSDs) calculated by the KJS method (Kruk et al., *Langmuir* 13, 1997, 6267) from nitrogen adsorption isotherms for the SBA-16 samples calcined and extracted-calcined at 450 °C.

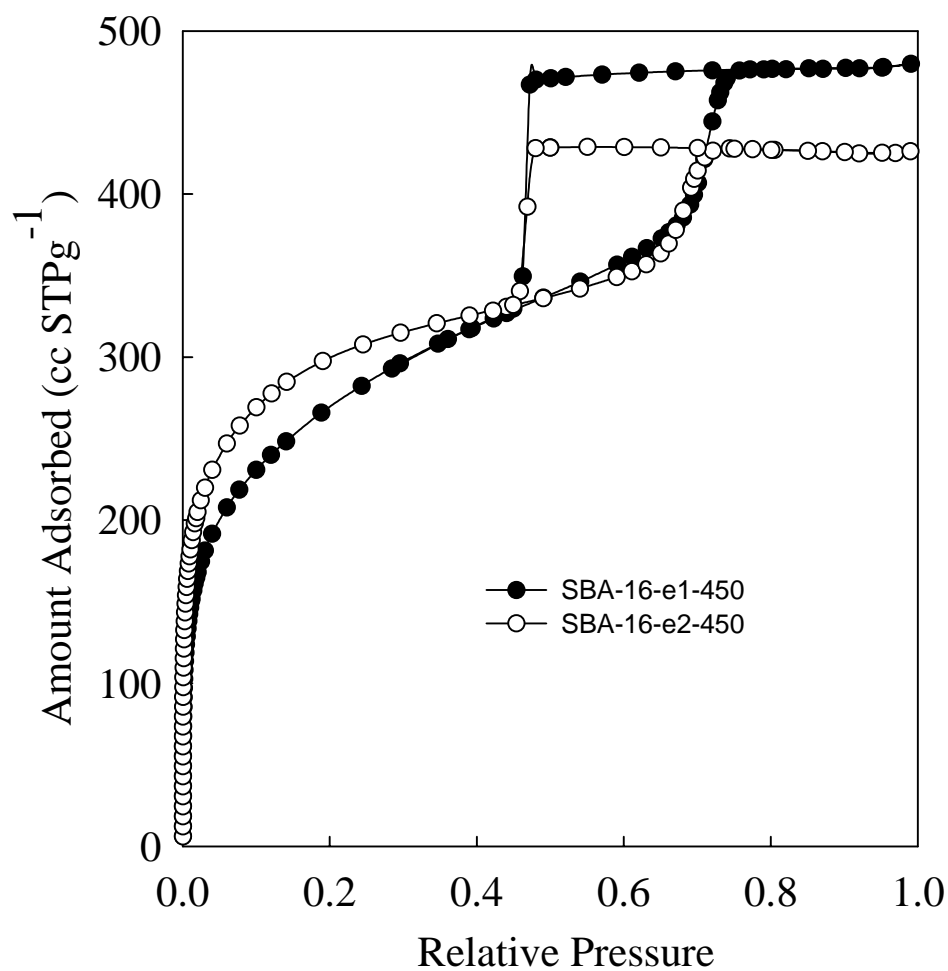

**Figure 2S.**

Comparison of nitrogen adsorption-desorption isotherms measured at  $-196\text{ }^{\circ}\text{C}$  for the SBA-16 samples denoted as SBA-16-ex-450, where ex and  $450^{\circ}\text{C}$  indicate extraction resulted in removing different amount of polymeric template (see Table 1S) and temperature of calcination, respectively.

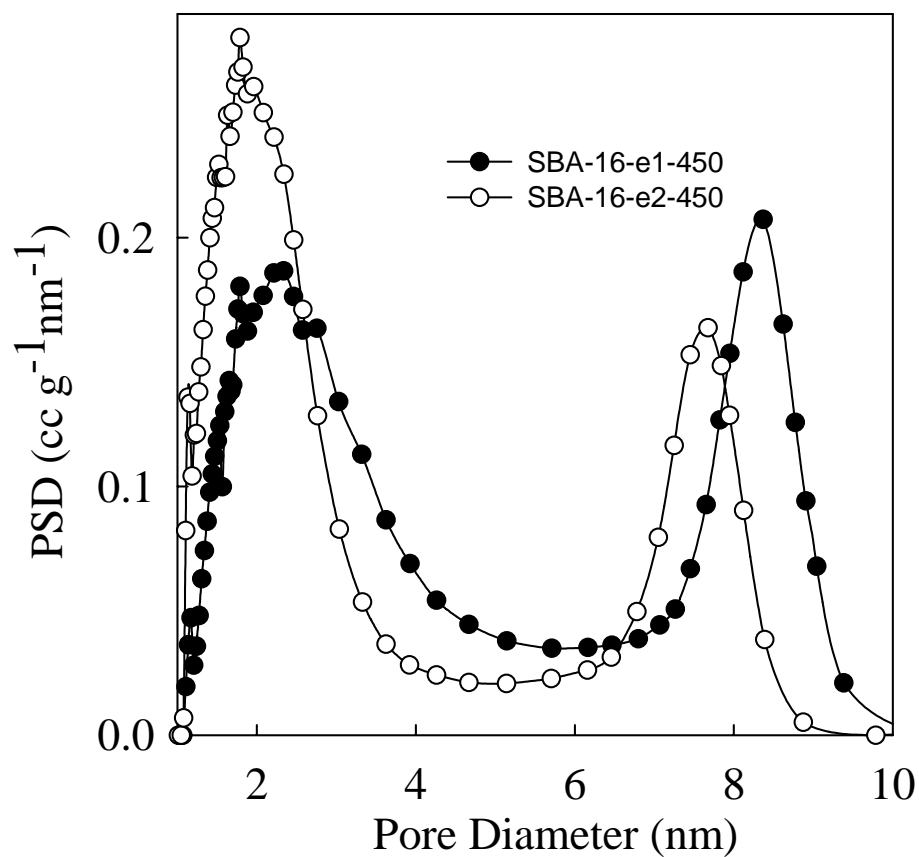

**Figure 3S.**

Pore size distributions (PSDs) calculated by the KJS method (Kruk et al., *Langmuir* 13, 1997, 6267) from nitrogen adsorption isotherms for the SBA-16 samples denoted as SBA-16-ex-450, where ex and 450°C indicate extraction resulted in removing different amount of polymeric template (see Table 1S) and temperature of calcination, respectively.

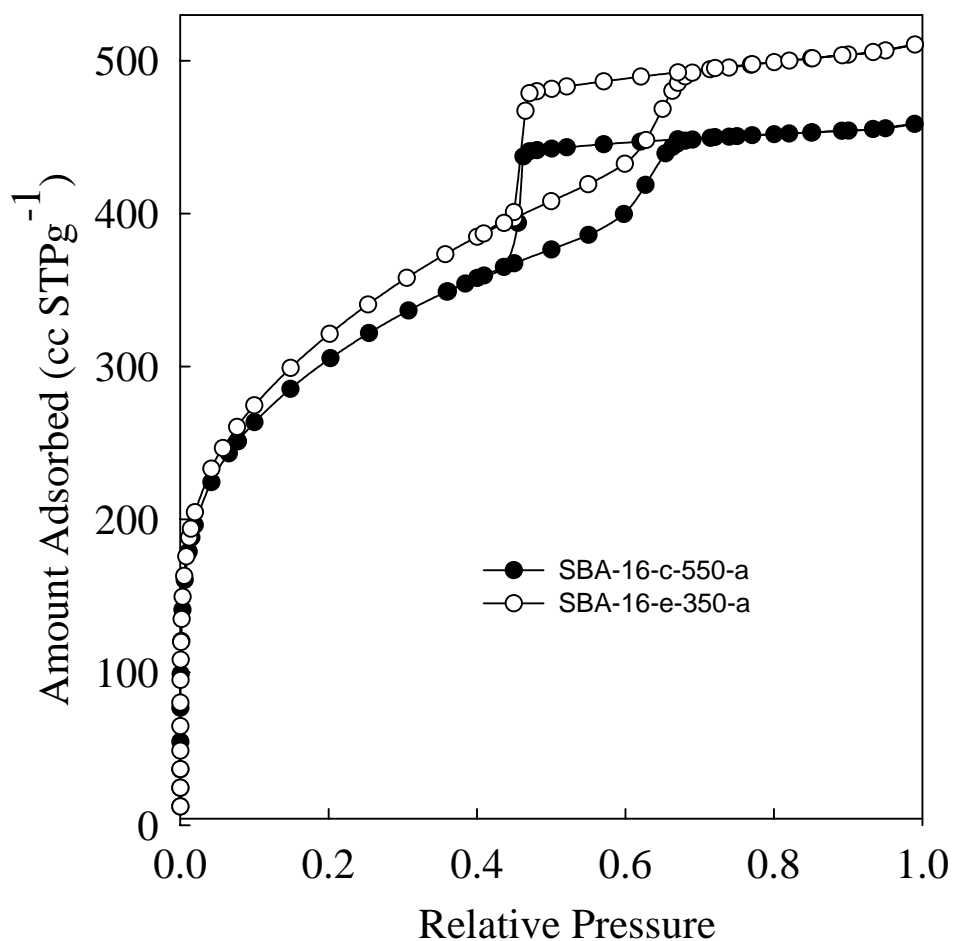

**Figure 4S.**

Comparison of nitrogen adsorption-desorption isotherms measured at  $-196\text{ }^{\circ}\text{C}$  for the SBA-16 samples denoted as SBA-16-x-y-a, where x denotes either extraction (e) or calcination (c), y denotes temperature of calcination and a refers to the synthesis recipe reported by Ryoo et al. (*J. Phys. Chem. B* 108, 2004, 11480).

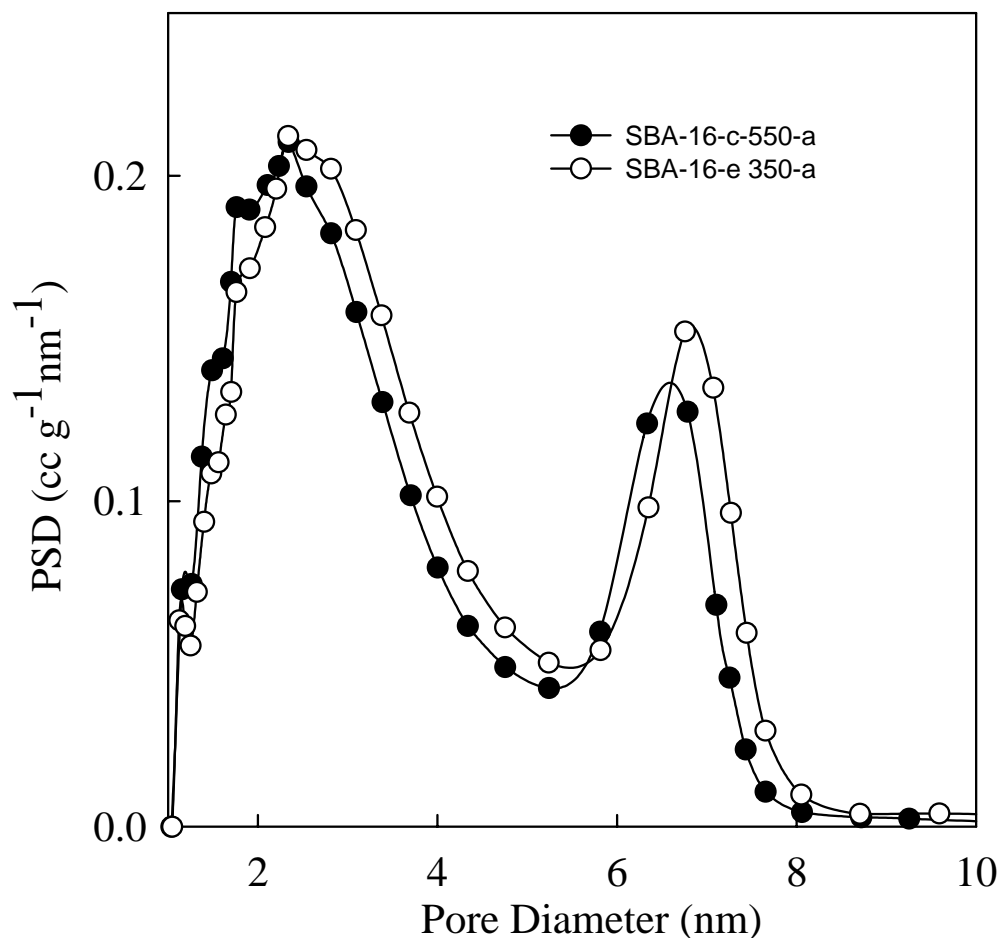

**Figure 5S.**

Pore size distributions (PSDs) calculated by the KJS method (Kruk et al., *Langmuir* 13, 1997, 6267) from nitrogen adsorption isotherms for the SBA-16 samples denoted as SBA-16-x-y-a, where x denotes either extraction (e) or calcination (c), y denotes temperature of calcination and a refers to the synthesis recipe reported by Ryoo et al. (*J. Phys. Chem. B* 108, 2004, 11480).

**Table 1S.**

Structural properties determined from XRD, elemental analysis and nitrogen adsorption data for as-synthesized SBA-16 samples extracted to remove different amounts of the template (e1 and e2) and calcined at 450 °C.

| <b>Sample</b>             | <b>S<sub>BET</sub></b>               | <b>V<sub>t</sub></b>       | <b>V<sub>p</sub></b>       | <b>w<sub>KJS</sub></b> | <b>% C</b> |
|---------------------------|--------------------------------------|----------------------------|----------------------------|------------------------|------------|
|                           | <b>(m<sup>2</sup>g<sup>-1</sup>)</b> | <b>(cc g<sup>-1</sup>)</b> | <b>(cc g<sup>-1</sup>)</b> | <b>(nm)</b>            |            |
| <b>SBA-16-e1-450</b>      | 980                                  | 0.75                       | 0.38                       | 8.34                   | 0.15       |
| <b>SBA-16-e2-450</b>      | 1101                                 | 0.67                       | 0.23                       | 7.68                   | 0.71       |
| <b>SBA-16-extracted 1</b> | 941                                  | 0.60                       | 0.23                       | 7.02                   | 5.13       |
| <b>SBA-16-extracted 2</b> | -                                    | -                          | -                          | -                      | 11.91      |
| <b>SBA-16-composite</b>   | -                                    | -                          | -                          | -                      | 19.64      |

Notation: S<sub>BET</sub>, BET specific surface area; V<sub>t</sub>, total pore volume; V<sub>p</sub>, volume of primary mesopores; w<sub>KJS</sub>, diameter of mesopore cages estimated using the KJS method developed for cylindrical mesopores ( the actual diameter of spherical pores of SBA-16 is likely to be about 2 nm higher than the values provided); % C, carbon percentage; a, unit cell parameter; -, parameters not determined.
